# Supplementary material for: From a silane monomer to anisotropic buckled silica nanospheres: a polymer-mediated, solvent-free and one-pot synthesis
Source: Royal Society of Chemistry journal article supplement (doi:10.1039/c7sm01043e), 2017-01-01
Supplement: c7sm01043e1.pdf [file c7sm01043e1.pdf]

## Electronic Supplementary Information (ESI)

### **From a silane monomer to anisotropic buckled silica nanospheres: a polymer-mediated, solvent-free and one-pot synthesis**

Chih-Hui Lo<sup>1</sup> and Teh-Min Hu<sup>1,2\*</sup>

1. School of Pharmacy, National Defense Medical Center, Taipei, Taiwan, ROC
2. Faculty of Pharmacy, School of Pharmaceutical Sciences, National Yang-Ming University, Taipei, Taiwan, ROC

\*Corresponding author: Teh-Min Hu, Ph.D. [tehmin@ym.edu.tw](mailto:tehmin@ym.edu.tw), Faculty of Pharmacy, School of Pharmaceutical Sciences, National Yang-Ming University, Taipei, Taiwan.

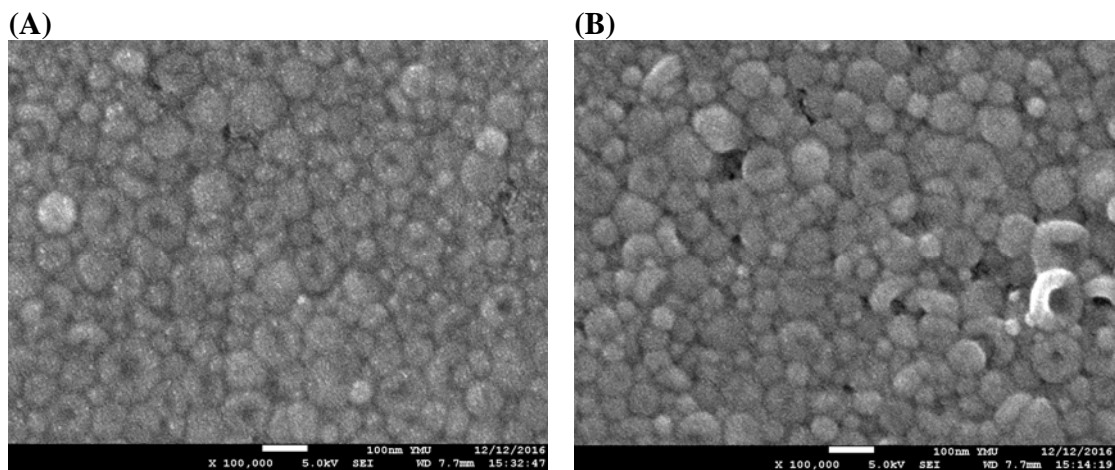

**Figure S1. SEM images for SiNPs formed at (A) 120 min and (B) 180 min (Supplementary to Figure 5).** The reaction condition was: MPTMS, 60 mM; PVA (80% hydrolyzed), 0.5%; HCl, 0.5 M; and NaNO<sub>2</sub>, 60 mM; 25 °C; total volume: 3 mL

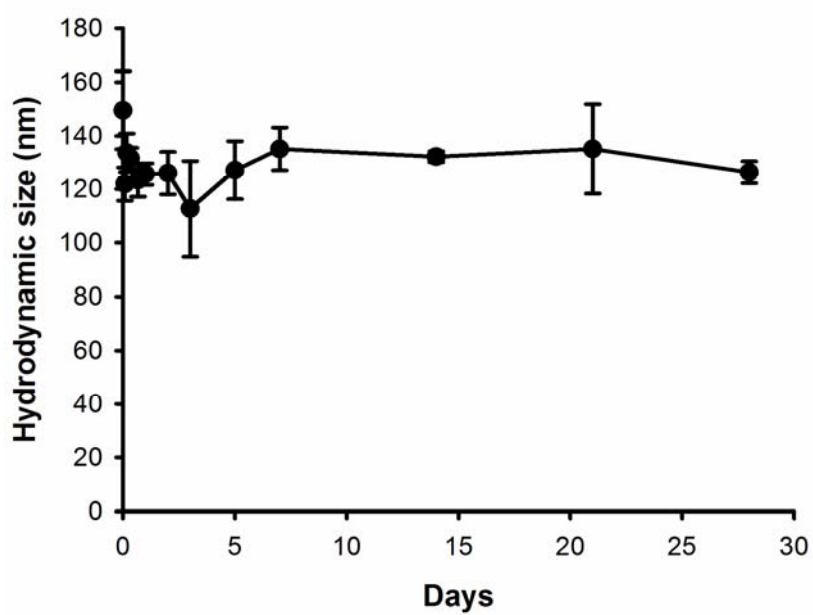

**Figure S2. Physical stability of SiNPs in an aqueous dispersion over a period of 28 days.**

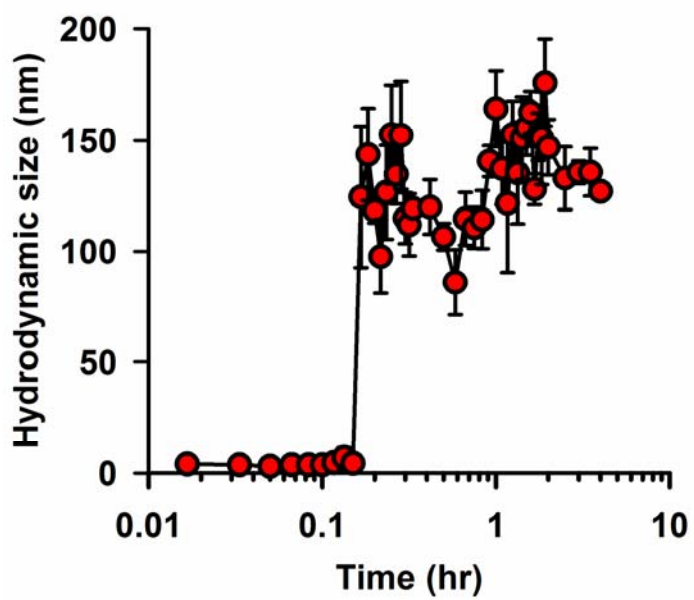

Figure S3. Monitoring the change of hydrodynamic sizes in the reaction over time.

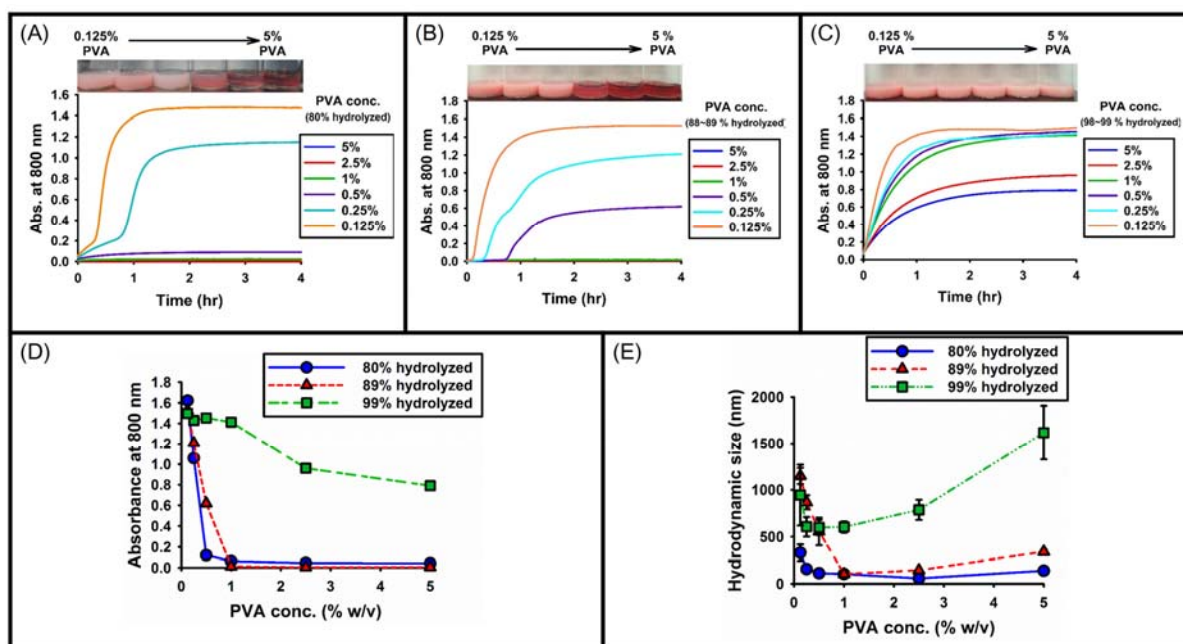

**Figure S4. Comparison of the effect of different PVAs (with different degree of hydrolysis) on particle formation and stabilization.** (A)-(C) The dynamics of particle formation (turbidity changes) for (A) 80% hydrolyzed PVA, (B) 89% hydrolyzed PVA, and (C) 99% hydrolyzed PVA. The corresponding images show the appearance of the reaction mixtures at the end of reaction (4 h). (D) Turbidity (optical density at 800 nm) as a function of PVA concentration. (E) Hydrodynamic sizes as a function of PVA concentration. Note that the same data for 80% hydrolyzed PVA in Figure 1 of the main text (Figure 1 B & D) was included for comparison.

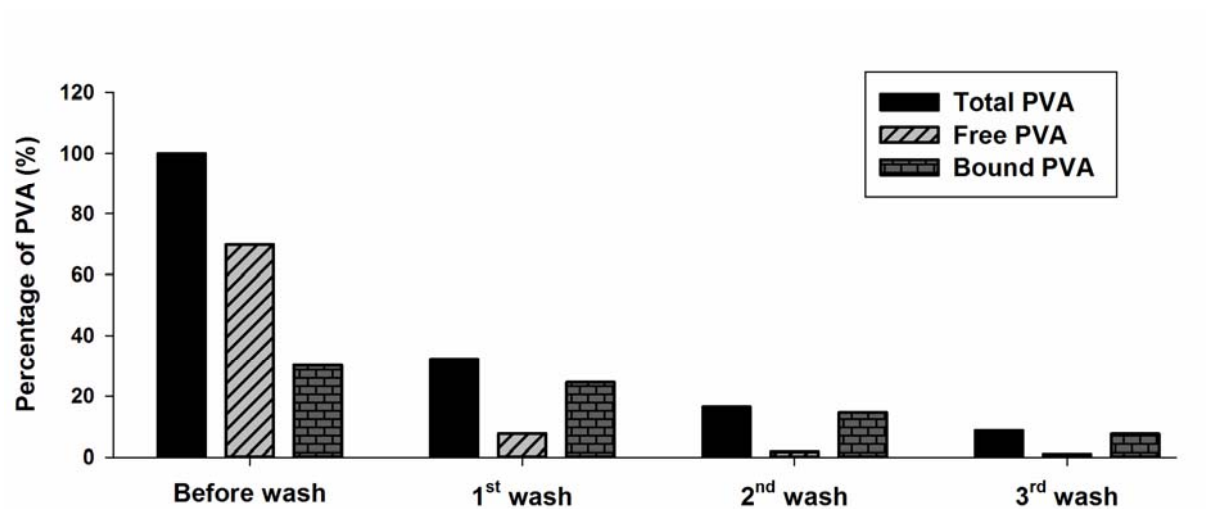

**Figure S5. The residual amount of PVA in SiNPs at different stages of preparation.** At each stage (right after synthesis and before wash, 1<sup>st</sup> wash, 2<sup>nd</sup> wash, and 3<sup>rd</sup> wash), total PVA was determined before centrifugation. Free PVA was determined from the supernatant after each centrifugation. Bound PVA was estimated by subtracting total from free.

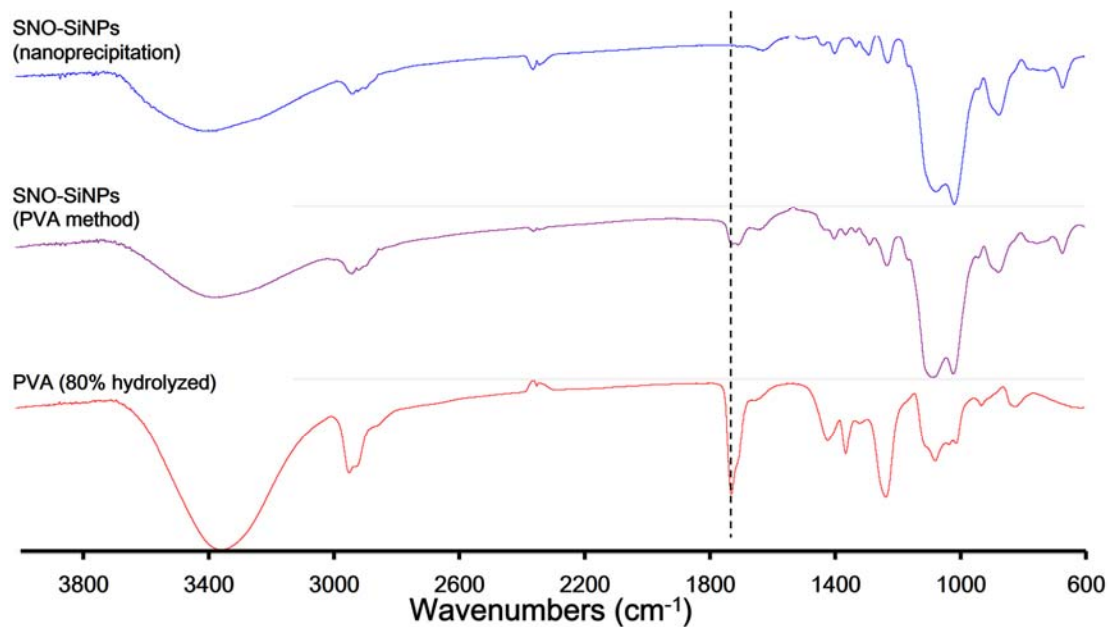

**Figure S6. FTIR spectra for SiNPs prepared by the nanoprecipitation method (without PVA, for comparison) and by the current PVA method.** Note that SiNPs made by the PVA method contain the characteristic peak of PVA at 1720 cm<sup>-1</sup> (C=O stretching).
